# Supplementary material for: Brief communication: Alternation of thaw zones and deep permafrost in the cold climate conditions of the East Siberian Mountains, Suntar-Khayata Range
Source: Copernicus journal article supplement (doi:10.5194/tc-17-4601-2023), 2023-11-03
Supplement: Supplementary file 1 [file tc-17-4601-2023-supplement.pdf]

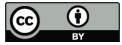

*Supplement of*

**Brief communication: Alternation of thaw zones and deep permafrost in the cold climate conditions of the East Siberian Mountains, Suntar-Khayata Range**

**Robert Sysolyatin et al.**

*Correspondence to:* Robert Sysolyatin (robertseesaw@gmail.com)

The copyright of individual parts of the supplement might differ from the article licence.

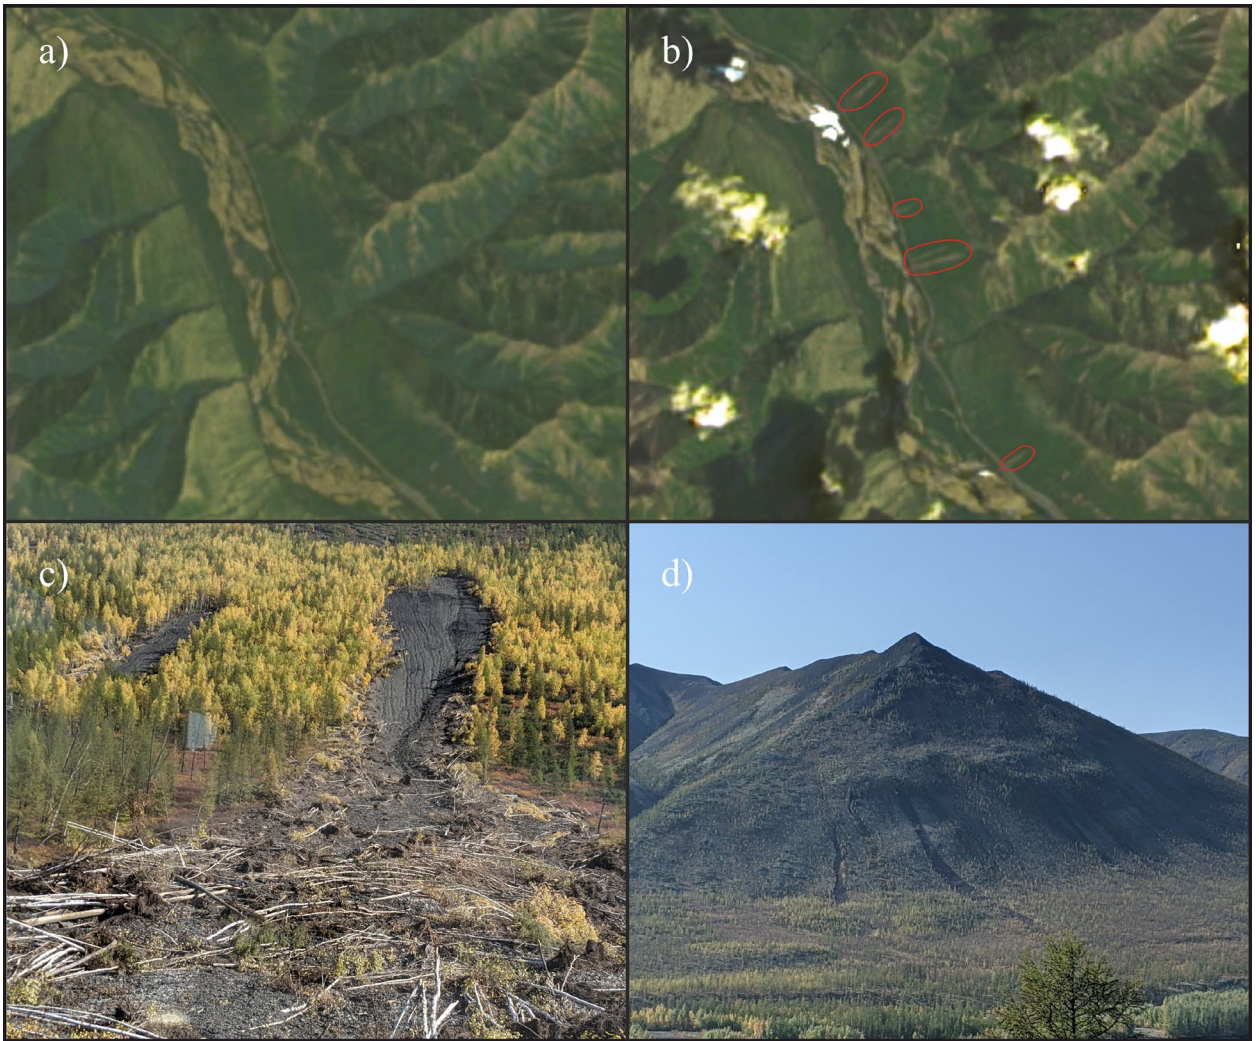

1

2 **Figure S1: The MAXAR image of Kolyma Route section before landslides caused to heavy rains in 2020 (a) and after in**  
3 **2022 (b). Field observation of debris landslides (c) the souths aspect slope and (d) the north aspect slope.**

4
